# Supplementary material for: ThOracic Ultrasound in Idiopathic Pulmonary Fibrosis Evolution (TOUPIE): research protocol of a multicentric prospective study
Source: HighWire-hosted journal article supplement (doi:10.1136/bmjopen-2020-039078), 2021-03-01
Supplement: bmjopen-2020-039078supp001_data_supplement.pdf [file bmjopen-2020-039078supp001_data_supplement.pdf]

**Supplementary table 1:** comparison of key criteria for 2013 ATS/ERS, 2017 French society and 2018 ATS/ERS/JLS/ALAT guidelines

|                             | <b>ATS/ERS/JRS/ALAT diagnostic criteria for idiopathic pulmonary fibrosis (IPF) [1]</b>                                                                                                                                                                                  | <b>ATS/ERS/JRS/ALAT diagnostic criteria for idiopathic pulmonary fibrosis (IPF) [2]</b>                                                                                                                                                                                   | <b>Diagnosis of Idiopathic Pulmonary Fibrosis An Official ATS/ERS/JRS/ALAT Clinical Practice Guideline [3]</b>                                                                                                                                                                                       |
|-----------------------------|--------------------------------------------------------------------------------------------------------------------------------------------------------------------------------------------------------------------------------------------------------------------------|---------------------------------------------------------------------------------------------------------------------------------------------------------------------------------------------------------------------------------------------------------------------------|------------------------------------------------------------------------------------------------------------------------------------------------------------------------------------------------------------------------------------------------------------------------------------------------------|
| <b>Year</b>                 | <b>2013</b>                                                                                                                                                                                                                                                              | <b>2017</b>                                                                                                                                                                                                                                                               | <b>2018</b>                                                                                                                                                                                                                                                                                          |
| <b>UIP pattern</b>          | <u>All 4 features:</u> <ul style="list-style-type: none"> <li>- Subpleural, basal predominance</li> <li>- Reticular abnormality</li> <li>- Honeycombing with or without traction bronchiectasis</li> <li>- Absence of features listed as inconsistent with UP</li> </ul> | <u>All 4 features:</u> <ul style="list-style-type: none"> <li>- Basal and subpleural predominance</li> <li>- Reticulation</li> <li>- Honeycombing with or without traction bronchiectasis</li> <li>- Absence of features of not possible with a pattern of UIP</li> </ul> | <ul style="list-style-type: none"> <li>- Subpleural and basal predominant; distribution is often heterogeneous</li> <li>- Honeycombing with or without peripheral traction bronchiectasis or bronchiolectasis</li> </ul>                                                                             |
| <b>Possible UIP pattern</b> | <u>All 3 features:</u> <ul style="list-style-type: none"> <li>- Subpleural, basal predominance</li> <li>- Reticular abnormality</li> <li>- Absence of features listed as inconsistent with UIP pattern</li> </ul>                                                        | <u>All 3 features:</u> <ul style="list-style-type: none"> <li>- Basal and subpleural predominance</li> <li>- Reticulation</li> <li>- Absence of features with a pattern of UIP</li> </ul>                                                                                 | <b>Probable UIP</b> <ul style="list-style-type: none"> <li>- Subpleural and basal predominant; distribution is often heterogeneous</li> <li>- Reticular pattern with peripheral traction bronchiectasis or bronchiolectasis</li> <li>- May have mild ground glass opacities (GGO)</li> </ul>         |
|                             |                                                                                                                                                                                                                                                                          |                                                                                                                                                                                                                                                                           | <b>Indeterminate for UIP</b> <ul style="list-style-type: none"> <li>- Subpleural and basal predominant</li> <li>- Subtle reticulation; may have mild GGO or distortion (“early UIP pattern”)</li> <li>- CT features and/or distribution of lung fibrosis that do not suggest any specific</li> </ul> |

|                              |                                                                                                                                                                                                                                                                                                                                                                                                                                                                                                                                                                 |                                                                                                                                                                                                                                                                                                                                                                                                                                                                                                                                                                               | etiology (“truly indeterminate for UIP”)                                                                                                                                                                                                                                                                                                                                                                                                                                                                                                                                                                                                                                                                                                                                                                                                                                                                                               |
|------------------------------|-----------------------------------------------------------------------------------------------------------------------------------------------------------------------------------------------------------------------------------------------------------------------------------------------------------------------------------------------------------------------------------------------------------------------------------------------------------------------------------------------------------------------------------------------------------------|-------------------------------------------------------------------------------------------------------------------------------------------------------------------------------------------------------------------------------------------------------------------------------------------------------------------------------------------------------------------------------------------------------------------------------------------------------------------------------------------------------------------------------------------------------------------------------|----------------------------------------------------------------------------------------------------------------------------------------------------------------------------------------------------------------------------------------------------------------------------------------------------------------------------------------------------------------------------------------------------------------------------------------------------------------------------------------------------------------------------------------------------------------------------------------------------------------------------------------------------------------------------------------------------------------------------------------------------------------------------------------------------------------------------------------------------------------------------------------------------------------------------------------|
| <b>Alternative diagnosis</b> | <u>Any of the seven features:</u> <ul style="list-style-type: none"> <li>- Upper or mid-lung predominance</li> <li>- Peribronchovascular predominance</li> <li>- Extensive ground glass abnormality (extent &gt;reticular abnormality)</li> <li>- Profuse micronodules (bilateral, predominantly upper lobes)</li> <li>- Discrete cysts (multiple, bilateral, away from areas of honeycombing)</li> <li>- Diffuse mosaic attenuation/air-trapping (bilateral in three or more lobes)</li> <li>- Consolidation in bronchopulmonary segment(s)/lobe(s)</li> </ul> | <u>At least one of these features:</u> <ul style="list-style-type: none"> <li>- Predominance in the upper zones or in the middle part of the lungs</li> <li>- Peribronchovascular predominance</li> <li>- Ground glass opacities more extensive than reticulation</li> <li>- Profuse micronodules (bilateral, predominant in the upper lobes)</li> <li>- Non-contiguous cysts (multiples, bilateral, remote from honeycombing areas)</li> <li>- Diffuse mosaic/air-trapping attenuation (bilateral, in 3 or more lobes)</li> <li>- Segmental or lobar condensation</li> </ul> | Findings suggestive of another diagnosis, including: <ul style="list-style-type: none"> <li>- CT features:               <ul style="list-style-type: none"> <li>◦ Cysts</li> <li>◦ Marked mosaic attenuation</li> <li>◦ Predominant GGO</li> <li>◦ Profuse micronodules</li> <li>◦ Centrilobular nodules</li> <li>◦ Nodules</li> <li>◦ Consolidation</li> </ul> </li> <li>- Predominant distribution:               <ul style="list-style-type: none"> <li>◦ Peribronchovascular</li> <li>◦ Perilymphatic</li> <li>◦ Upper or mid-lung</li> </ul> </li> <li>- Other:               <ul style="list-style-type: none"> <li>◦ Pleural plaques (consider asbestosis)</li> <li>◦ Dilated esophagus (consider CTD)</li> <li>◦ Distal clavicular erosions (consider RA)</li> <li>◦ Extensive lymph node enlargement (consider other etiologies)</li> <li>◦ Pleural effusions, pleural thickening (consider CTD/drugs)</li> </ul> </li> </ul> |

1 Wells AU. The revised ATS/ERS/JRS/ALAT diagnostic criteria for idiopathic pulmonary fibrosis (IPF)--practical implications. *Respir Res* 2013;14 Suppl 1:S2. doi:10.1186/1465-9921-14-S1-S2

2 Cottin V, Crestani B, Cadranel J, *et al.* [French practical guidelines for the diagnosis and management of idiopathic pulmonary fibrosis. 2017 update. Full-length update]. *Rev Mal Respir* Published Online First: 21 September 2017. doi:10.1016/j.rmr.2017.07.018

3 Raghu G, Remy-Jardin M, Myers JL, *et al.* Diagnosis of Idiopathic Pulmonary Fibrosis. An Official ATS/ERS/JRS/ALAT Clinical Practice Guideline. *Am J Respir Crit Care Med* 2018;198:e44–68. doi:10.1164/rccm.201807-1255ST
